# Supplementary material
Source: HighWire-hosted journal article supplement (http://www.cmaj.ca/highwire/filestream/58228/field_highwire_adjunct_files/6/know-clark-7-at_online.pdf)
Supplement: know-clark-7-at_online.pdf [file know-clark-7-at_online.pdf]

**Appendix 7:** Responses by 101 Members of Parliament and senior aides when asked about their perceptions of health research funding levels in relation to total government spending and total government health care spending, prior to learning actual health research funding levels

| Response (as stated in questionnaire) | Perceive health research funding<br>≤ actual levels,<br>no. (%) of respondents |                                          | Perceive health research funding<br>> actual levels,<br>no. (%) of respondents |                                          |
|---------------------------------------|--------------------------------------------------------------------------------|------------------------------------------|--------------------------------------------------------------------------------|------------------------------------------|
|                                       | Government<br>spending<br><i>n</i> = 36                                        | Health care<br>spending<br><i>n</i> = 29 | Government<br>spending<br><i>n</i> = 57                                        | Health care<br>spending<br><i>n</i> = 64 |
| Just the right amount of funding      | 3 (8.3)                                                                        | —                                        | 11 (19.3)                                                                      | 15 (23.4)                                |
| Not enough funding                    | 33 (91.7)                                                                      | 28 (96.6)                                | 43 (75.4)                                                                      | 49 (76.6)                                |
| Too much funding                      | —                                                                              | —                                        | 2 (3.5)                                                                        | —                                        |
| Don't know                            | —                                                                              | 1 (3.4)                                  | 1 (1.8)                                                                        | —                                        |
